# Supplementary material
Source: MDPI journal article supplement (https://www.mdpi.com/2227-9040/8/2/24)
Supplement: s1 [file s1]

**Table S1.** EDS characterization of OSTE surfaces, either raw or treated (incubation and UV treatments) with gold nanoparticles. Plates were washed with ultra-pure water using ultrasound for 1 min before surface analysis (See experimental section for more details on experimental conditions).

| <b>Treatment</b> | <b>2.5 thiol</b> | <b>1.3 allyl</b> |
|------------------|------------------|------------------|
| Control          | 0 %              | 0 %              |
| Incubation       | 2.02 %           | 0 %              |
| UV               | 0.47 %           | 0.06 %           |

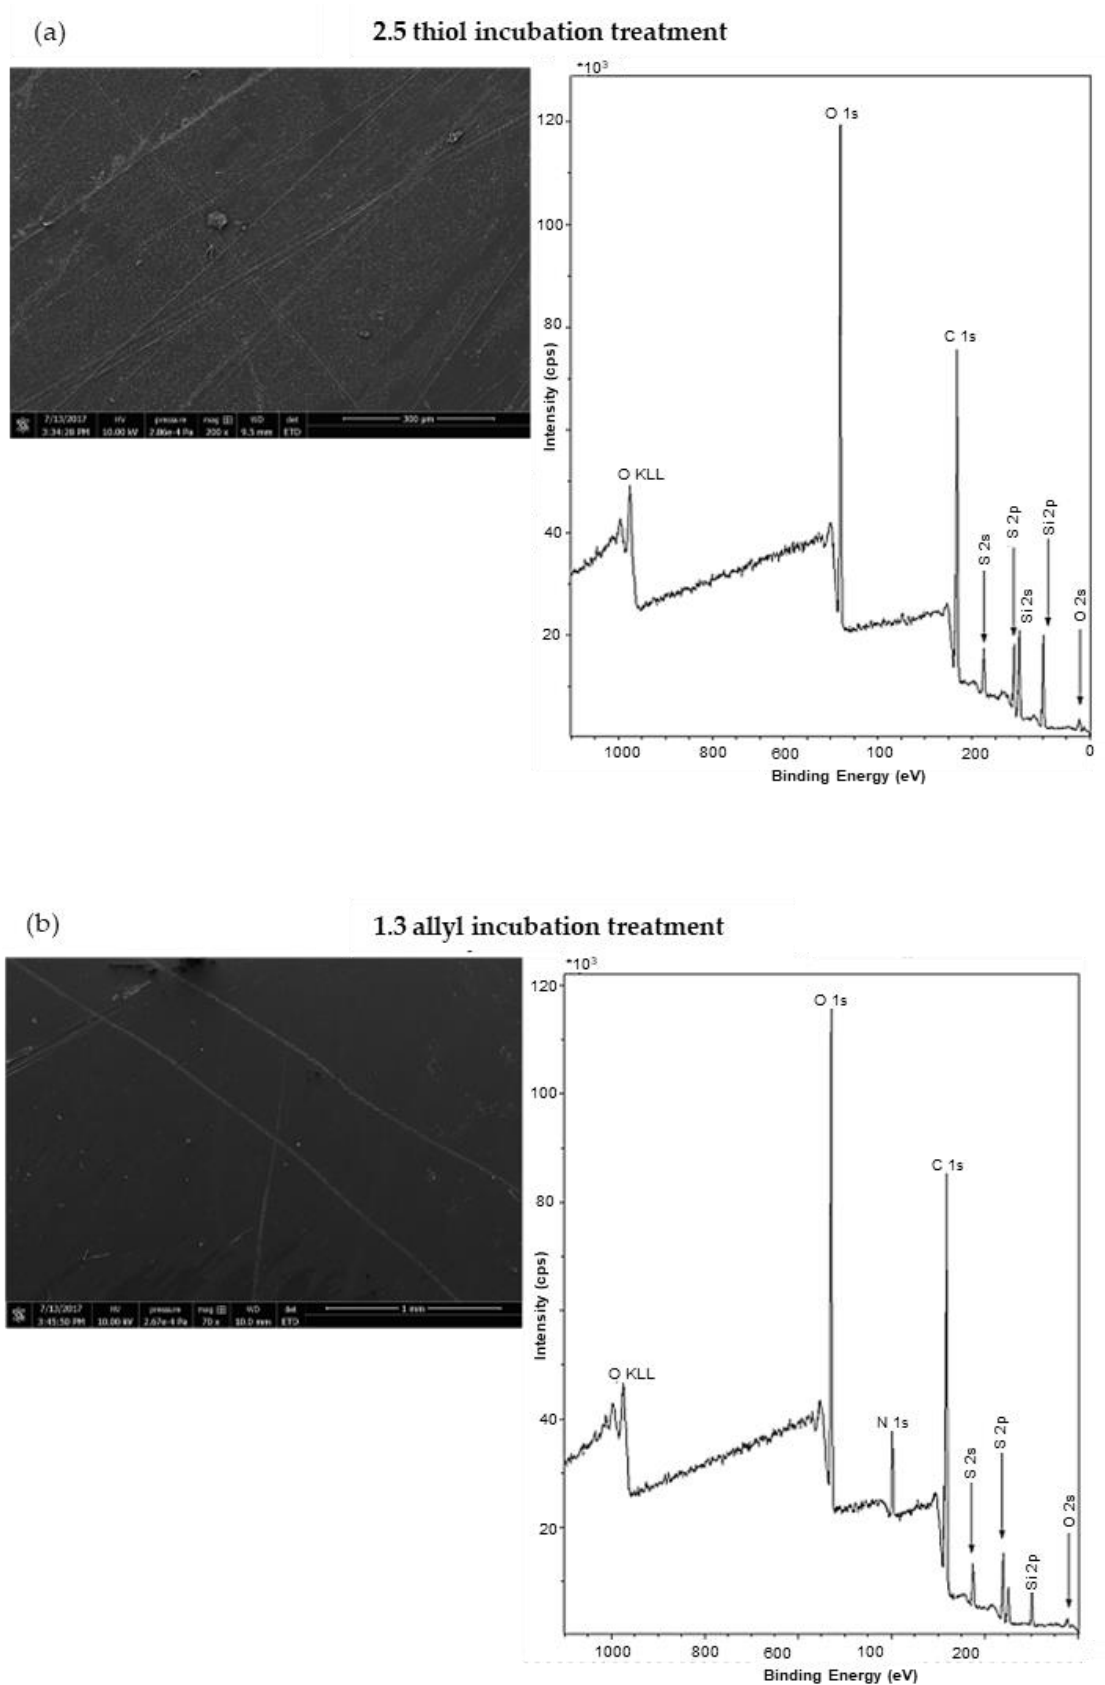

**Figure S1.** SEM micrography and XPS spectra of OSTE surfaces ((a) 2.5 thiol and (b) 1.3 allyl) after incubation with gold nanoparticles. Plates were washed with ultra-pure water using an ultrasound

for 1 min before surface characterizations (See experimental section for more details on experimental conditions).
